# Supplementary material
Source: PubMed Central journal article supplement (PMC7873682)
Supplement: mmc1.pdf [file mmc1.pdf]

# Medical Education During COVID-19: Faculty Perspectives

\* Required

1. You are being invited to participate in an online survey. This questionnaire is collecting medical college faculty's perspective regarding online learning during COVID crisis. We invite you to provide your response, which shall be analyzed anonymously. Privacy will be maintained. Data so collected will be useful for strengthening educational activities in the college. There are no associated risks involved. It will take 5 minutes of your time. Do you agree to participate in the survey? \*

*Mark only one oval.*

Yes

2. 1. Your total undergraduate teaching experience as faculty (excluding residency)? \*

*Mark only one oval.*

< 5 yr

5-10 yr

>10 yr

3. 2. In which medical subject have you specialized? \*

*Mark only one oval.*

Preclinical

Paraclinical

Clinical

4. 3. Are any online classes being held in your college during COVID crisis? \*

*Mark only one oval.*

- Yes  
 No

5. 4. Have you participated in any online educational activity in the college during this period? \*

*Mark only one oval.*

- Yes  
 No  
 Not Applicable

6. 5. Which of the following e-learning opportunities have been ADDITIONALLY introduced in your college during the COVID-19 crisis? \*

*Check all that apply.*

- Online lecture/ webinar  
 Small group discussions on online platforms (like zoom)  
 Reading material (sent online)  
 Online assessments  
 None

Other:  \_\_\_\_\_

7. 6. Kindly rate your experience of an online class/ lecture/ webinar if taken/ attended

*Mark only one oval.*

|                |                       |                       |                       |                       |                       |           |
|----------------|-----------------------|-----------------------|-----------------------|-----------------------|-----------------------|-----------|
|                | 1                     | 2                     | 3                     | 4                     | 5                     |           |
| Unsatisfactory | <input type="radio"/> | Excellent |

8. 7. How would you rate the following features of online learning as per your experience? Please score each where 1- Poor and 5- Excellent \*

*Mark only one oval per row.*

|                                        | 1                     | 2                     | 3                     | 4                     | 5                     |
|----------------------------------------|-----------------------|-----------------------|-----------------------|-----------------------|-----------------------|
| Timing and scheduling                  | <input type="radio"/> |
| Connectivity                           | <input type="radio"/> |
| Logistics- technical help, hardware    | <input type="radio"/> |
| Lesson preparation                     | <input type="radio"/> |
| Convenience and access for teacher     | <input type="radio"/> |
| Interest and interaction with students | <input type="radio"/> |

9. 8. Will you be interested in including online teaching modules in routine curriculum once classroom teaching re-starts after the COVID-19 crisis? \*

*Mark only one oval.*

- Yes  
 No  
 Maybe

10. 9. If yes, should it replace theory classes completely or add on to those? \*

*Mark only one oval.*

- 0% classroom: 100% online  
 up to 30% classroom: 70% online  
 50:50  
 70% classroom: 30% online  
 Only classroom

11. 10. Would you recommend online platforms for internal assessments in routine curriculum? \*

*Mark only one oval.*

Yes

No

Maybe

12. 11. Please let us know your thoughts on undergraduate teaching during the lock-down associated with COVID-19? \*

---

---

This content is neither created nor endorsed by Google.

Google Forms
