# Supplementary material
Source: PubMed Central journal article supplement (PMC7873682)
Supplement: mmc2.pdf [file mmc2.pdf]

# Medical Education During COVID-19: Learner's Perspectives

\* Required

1. This survey is being administered from Department of Pediatrics, MAMC. It will collect your responses regarding online teaching activities during COVID crisis. Response filling is voluntary and anonymous. Privacy will be maintained. Data so collected will be useful for strengthening educational activities in the college. There are no associated risks involved. It will take 5 minutes of your time. Do you agree to participate in the survey? \*

**INFORMATION SHEET**  
**DEPARTMENT OF PEDIATRICS**  
**MAULANA AZAD MEDICAL COLLEGE, Bahadur Shah Zafar Marg, ND- 110002**

You are being invited to participate in a brief survey. Before you take part in this study, we wish to explain the study to you & give you the chance to ask questions. Please read carefully the information provided here. If you agree to participate, please sign the informed consent form / tick yes box in Google forms.

**TITLE OF STUDY:** Medical Education During COVID-19: Faculty and student's Perspectives

**PURPOSE OF THE RESEARCH STUDY:** Online learning is an evolving modality with few associated concerns. COVID-19 pandemic has mandated the use of this technology for imparting medical education across the country. This study wanted to record the experiences of faculty regarding the same.

**Methodology:** You will be provided a link to an online survey form which contains few questions. You will be requested to participate in this survey which you can fill and submit online.

**Expected duration of the participation:** The questionnaire collects most responses as single best response or short answers. The survey will take 5-10 minutes to complete.

**Benefits to be expected from the research to the subjects or to others:** The study will help us know your experiences and anxieties with e-learning. Improvements or modifications in this method can then be planned to improve learning.

**Any additional risk to the subjects associated with the study:** None

**Maintenance of confidentiality of records:** All information collected in this study will be strictly confidential and will remain anonymous.

**Subject Participation:** Participation in this study is voluntary. Return will not influence his training process in the course duration.

**Cost and source of investigations:** No extra cost will be incurred

**WHO TO CONTACT IF YOU HAVE QUESTIONS:**

Dr. Aashima Dabas- Associate Professor, Department of Pediatrics, Maulana Azad Medical College & associated Lok Nayak hospital, Phone- 9968604424

Dr. Swarnim- Assistant Professor, Department of Pediatrics, Maulana Azad Medical College & associated Lok Nayak hospital

Dr Devendra Mishra- Director Professor, Department of Pediatrics, Maulana Azad Medical College & associated Lok Nayak hospital, Phone- 9968604416

**Institutional ethics committee-** Room number 304A, Anatomy block, Maulana Azad Medical College, Bahadur Shah zafar marg, ND. Phone: 01123237029 (Ext 380)

Check all that apply.

yes

## 2. Batch \*

*Mark only one oval.*

- MBBS - 1
- MBBS- 2
- MBBS 3 Part - I
- MBBS 3 Part - II
- Interns

## 3. Do you think medical education was adversely affected during lockdown? \*

*Mark only one oval.*

- Yes
- No

## 4. Number of hours spent per day on online learning at home ? \*

*Mark only one oval.*

- <1 hour
- 1-4hours
- > 4 hours

## 5. More time is spent on online learning than offline during COVID-19. \*

*Mark only one oval.*

- Strongly disagree
- Disagree
- Neutral
- Agree
- Strongly agree

6. What are the various modes of learning that you are using during Lockdown and your frequency of using them? \*

*Mark only one oval per row.*

|                                           | Never                 | Rarely                | Occasionally          | Frequently            | Very Frequently       |
|-------------------------------------------|-----------------------|-----------------------|-----------------------|-----------------------|-----------------------|
| Textbook                                  | <input type="radio"/> |
| Notes & other Offline Study material      | <input type="radio"/> |
| Online lectures organised by the college. | <input type="radio"/> |
| Online lectures of coaching institutes    | <input type="radio"/> |
| Other Online educational Sites            | <input type="radio"/> |

7. Have you attended any online lectures organised by the college during the lockdown period? \*

*Mark only one oval.*

- Yes  
 No

8. Do you find online classes useful as a mode of learning? \*

*Mark only one oval.*

- Yes  
 No

9. How much time in hours per you would like to spend every day on online lectures ? \*

*Mark only one oval.*

- < 1 hour
- 1-2 hours
- 2- 4 hours
- > 4 hours

10. What is the duration of each online lecture that you will prefer? \*

*Mark only one oval.*

- < 30 min
- 30 min- 1 hr
- 1-2 hr

11. Were you able to discuss and resolve your doubts during the online class ? \*

*Mark only one oval.*

- Yes
- No

12. The opportunity to interact with the educator was sufficient or not? \*

*Mark only one oval.*

- Yes
- No
- Maybe

13. Learning through online classes is better than traditional Classroom teaching. \*

Mark only one oval.

|                   |                       |                       |                       |                       |                       |                |
|-------------------|-----------------------|-----------------------|-----------------------|-----------------------|-----------------------|----------------|
|                   | 1                     | 2                     | 3                     | 4                     | 5                     |                |
| Strongly Disagree | <input type="radio"/> | Strongly Agree |

14. Would you like online classes to be included in your teaching curriculum in addition to classroom teaching after the lockdown period ? \*

Mark only one oval.

- For lectures
- For practical classes
- For both
- No online classes needed later

15. How many online classes for THEORY TOPICS would you like to include with traditional classes in the curriculum? ONLINE:TRADITIONAL \*

Mark only one oval.

- 100:0
- 70:30
- 50:50
- 30:70
- 0:100

16. How many online classes for PRACTICAL CLASSES would you like to include with traditional classes in the curriculum? ONLINE:TRADITIONAL \*

Mark only one oval.

- 100:0
- 70:30
- 50:50
- 30:70
- 0:100

17. What were the hindering factors during online classes? 1- no problem to 5- maximum problem \*

Mark only one oval per row.

|                                  | 1                     | 2                     | 3                     | 4                     | 5                     |
|----------------------------------|-----------------------|-----------------------|-----------------------|-----------------------|-----------------------|
| Connectivity/ internet           | <input type="radio"/> |
| Availability of a viewing device | <input type="radio"/> |
| Sound/ acoustics                 | <input type="radio"/> |
| Timings and scheduling           | <input type="radio"/> |
| Presentation                     | <input type="radio"/> |
| Lack of human interface          | <input type="radio"/> |

18. What were additional resource material that you are/ were using during COVID crisis for your learning? (MULTIPLE ANSWERS ALLOWED) \*

Check all that apply.

- Printed material- books, notes
- Online material- self study
- Online material- coaching centres
- Group learning with peers/ seniors

19. What were the facilitating factors during online classes? 1- not helpful to 5- Most helpful \*

*Mark only one oval per row.*

|                           | 1                     | 2                     | 3                     | 4                     | 5                     |
|---------------------------|-----------------------|-----------------------|-----------------------|-----------------------|-----------------------|
| Convenience & Access      | <input type="radio"/> |
| Better understanding      | <input type="radio"/> |
| Interesting               | <input type="radio"/> |
| Presentation              | <input type="radio"/> |
| Interaction with educator | <input type="radio"/> |
| Interaction with Peers    | <input type="radio"/> |

20. Which of these would you prefer and recommend during online classes? 1- Not prefer, 5- strongly recommend \*

Mark only one oval per row.

|                                                              | 1                     | 2                     | 3                     | 4                     | 5                     |
|--------------------------------------------------------------|-----------------------|-----------------------|-----------------------|-----------------------|-----------------------|
| Link for additional teaching-learning material               | <input type="radio"/> |
| Online videos or live demonstrations                         | <input type="radio"/> |
| Visual interface of the teacher                              | <input type="radio"/> |
| Break between two consecutive lectures                       | <input type="radio"/> |
| Option for questions/ doubts during the lecture              | <input type="radio"/> |
| Interactive quiz during the lecture with mandatory responses | <input type="radio"/> |
| Option for feedback about the class after the session        | <input type="radio"/> |
| Access platform for online classes in college/ library       | <input type="radio"/> |
| Option for offline viewing later                             | <input type="radio"/> |

21. Do you feel there are any ethical issues with medical education during COVID-19 crisis?

---

22. Your suggestions to improve the online classes \*

---

## 23. Your feedback regarding this survey \*

Mark only one oval.

|     |                       |                       |                       |                       |                       |           |
|-----|-----------------------|-----------------------|-----------------------|-----------------------|-----------------------|-----------|
|     | 1                     | 2                     | 3                     | 4                     | 5                     |           |
| Bad | <input type="radio"/> | Excellent |

---

This content is neither created nor endorsed by Google.

Google Forms
